# Supplementary material for: Faecalibacterium prausnitzii increases following fecal microbiota transplantation in recurrent Clostridioides difficile infection
Source: PubMed Central journal article supplement (PMC8034738; doi:10.1371/journal.pone.0249861), 2021-04-09
Supplement: pone.0249861.s001.pdf [file pone.0249861.s001.pdf]

---

**S1 Table. Basic demographics of donors.**

---

| <b>Study center</b> | <b>Age</b> | <b>Sex</b> |
|---------------------|------------|------------|
| Linköping           | 43         | Male       |
| Linköping           | 34         | Male       |
| Linköping           | 59         | Female     |
| Linköping           | 41         | Female     |
| Jönköping           | 61         | Male       |
| Jönköping           | 43         | Male       |
| Jönköping           | 49         | Male       |
| Jönköping           | 46         | Female     |
